# Supplementary material for: Aubergine and piRNAs promote germline stem cell self‐renewal by repressing the proto‐oncogene Cbl
Source: PubMed Central journal article supplement (PMC5666619; doi:10.15252/embj.201797259), 2017-10-13
Supplement: EMBJ-36-3194-s004.pdf [file EMBJ-36-3194-s004.pdf]

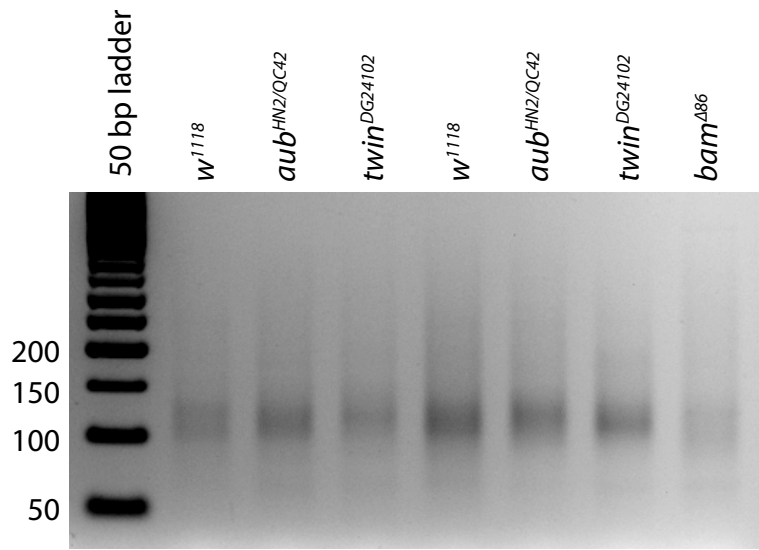

Replicate #1

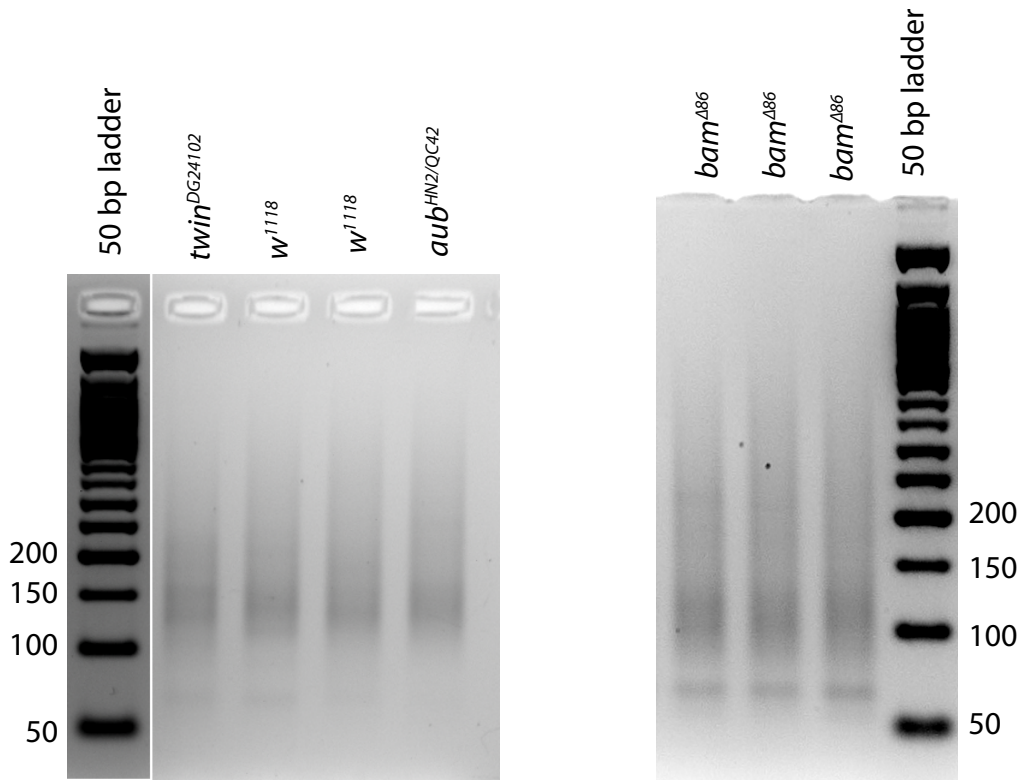

Replicate #2

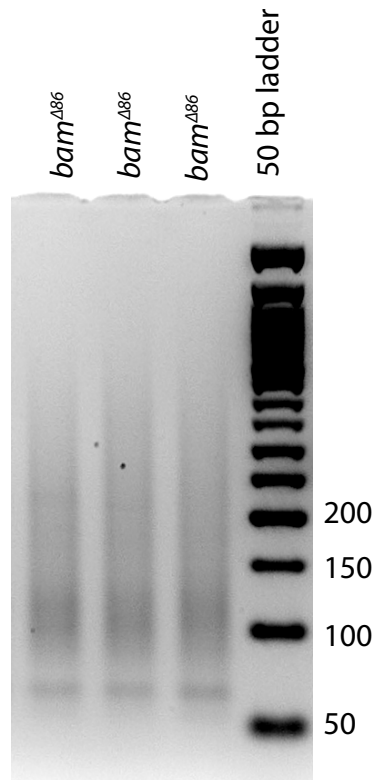

Replicate #3 (*bam*<sup>Δ86</sup>)

Source Data For Figure 4G
